# Supplementary material for: Three-dimensional cubic (Im3m) periodic mesoporous organosilicas with benzene- and thiophene-bridging groups
Source: Royal Society of Chemistry journal article supplement (doi:10.1039/b817967k), 2009-01-01
Supplement: b817967k.pdf [file b817967k.pdf]

### Three-Dimensional Cubic (*Im3m*) Periodic Mesoporous Organosilicas with Benzene- and Thiophene-Bridging Groups

Eun-Bum Cho,<sup>†</sup> Dukjoon Kim,<sup>†\*</sup> Joanna Gorka,<sup>‡</sup> and Mietek Jaroniec<sup>‡\*</sup>

<sup>†</sup>*Polymer Technology Institute, Department of Chemical Engineering, Sungkyunkwan University,  
Suwon, Gyeonggi-do 440-746, Korea*

<sup>‡</sup>*Department of Chemistry, Kent State University, Kent, Ohio, 44240 USA*

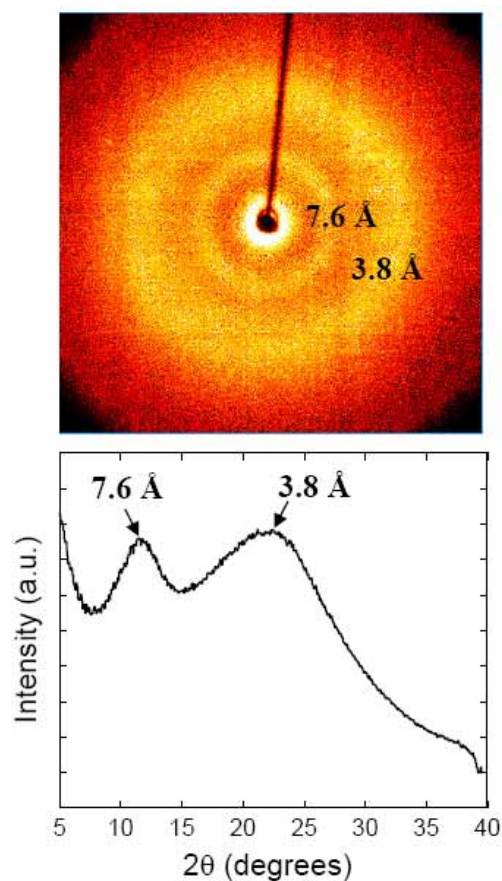

**Fig. S1.** WAXS image and data for cubic structured benzene-PMO prepared using F127 triblock copolymer under acidic conditions.

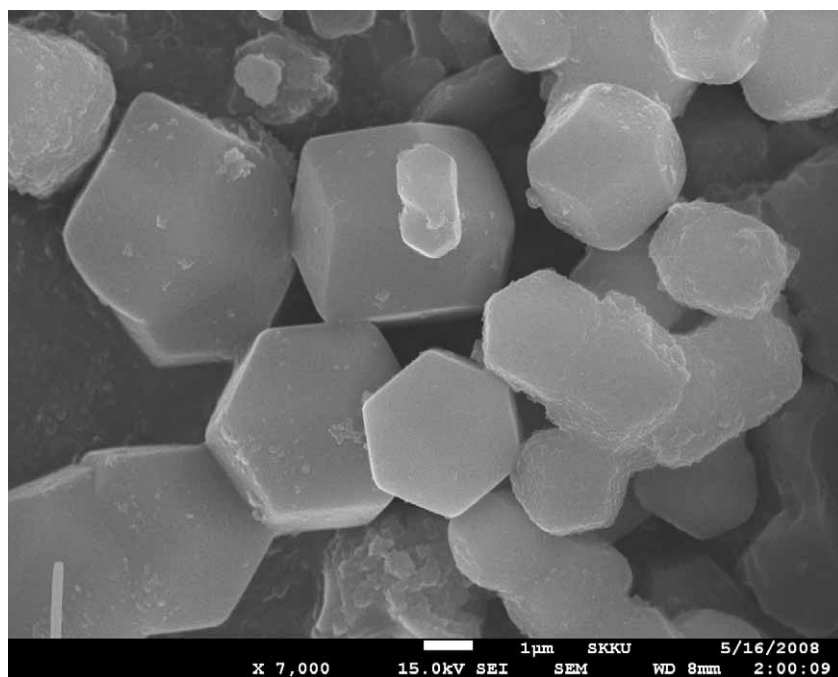

**Fig. S2.** SEM image for cubic structured benzene-PMO prepared using F127 triblock copolymer under acidic conditions.

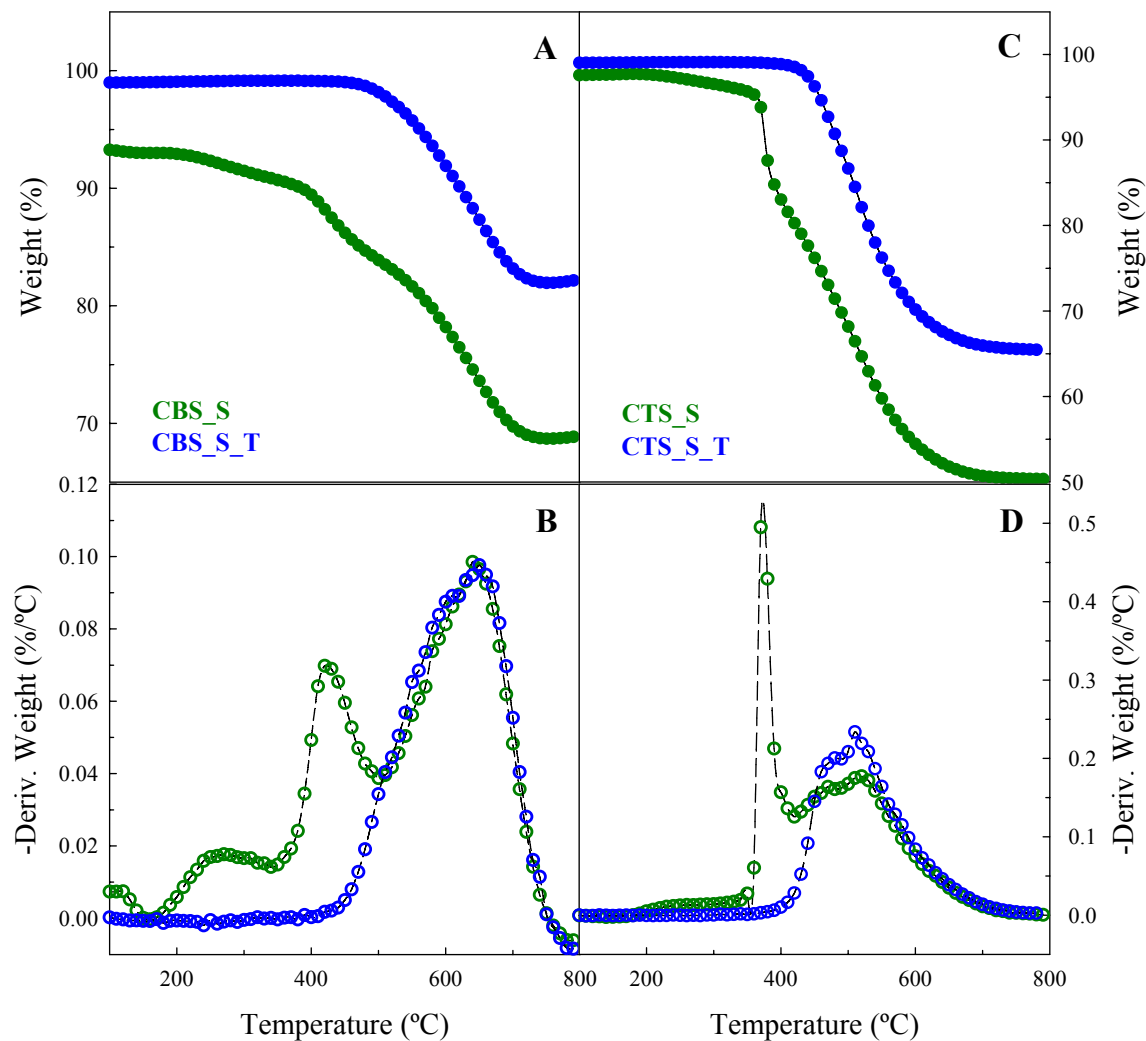

**Fig. S3.** Thermogravimetric profiles recorded in flowing nitrogen for the cubic benzene-PMO sample before (CBS\_S) and after (CBS\_S\_T) calcination in nitrogen (panels A and B) and the thiophene-PMO sample before (CTS\_S) and after (CTS\_S\_T) calcination in nitrogen (panels C and D). Green circles with line represent the TG and DTG profiles for the CBS\_S and CTS\_S samples, whereas the blue circles with line denote the corresponding TG and DTG curves for those samples subjected to an additional calcination in flowing nitrogen at 400 and 375 °C, respectively. As can be seen from these figures the DTG profiles for the CBS\_S and CTS\_S samples (extracted only; green circles) exhibit peaks before 400°C reflecting the removal of polymeric template; these peaks disappear for the corresponding samples subjected to additional calcination in flowing nitrogen (blue circles). While the polymer residue is relatively small in the case of benzene-PMO samples, it is significant in the case of thiophene-PMO sample; in the later case an additional calcination is needed to make cubic mesoporous structure accessible for nitrogen adsorption.

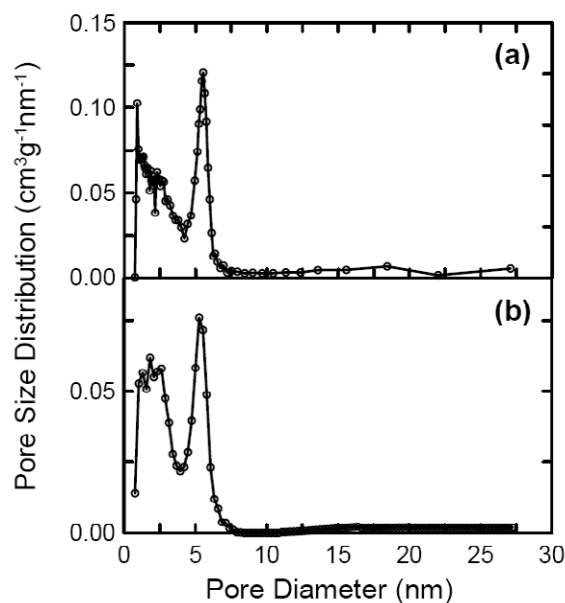

**Fig. S4.** Pore size distributions for cubic structured benzene-PMO (a) and thiophene-PMO (b) prepared using F127 triblock copolymer under acidic conditions.

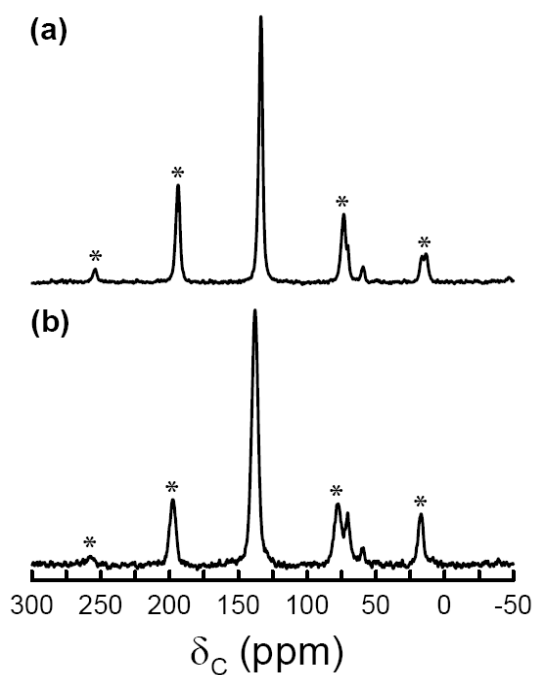

**Fig. S5.** Solid state <sup>13</sup>C CP-MAS NMR spectra for cubic structured benzene-PMO (a) and thiophene-PMO (b) prepared in this study. Samples were washed four times using a mixed solvent with ethanol and HCl as described in Experimental Section.

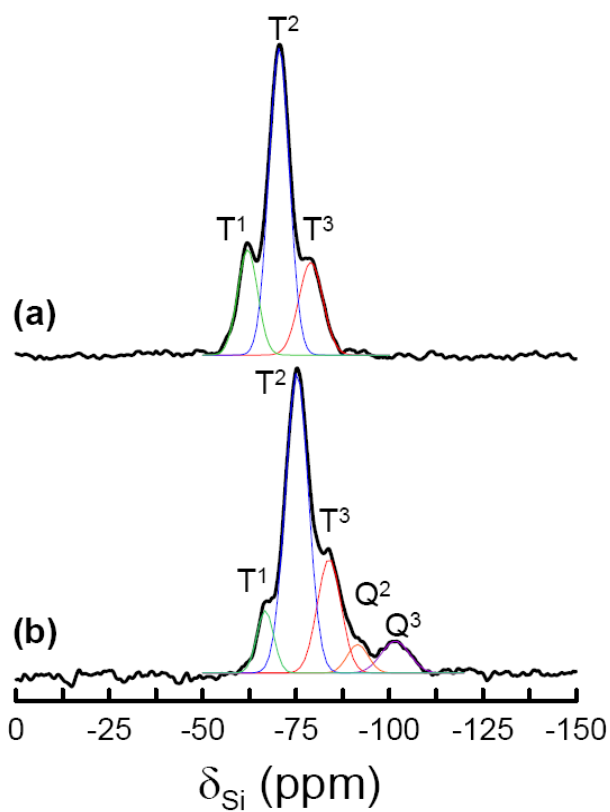

**Fig. S6.** Solid state  $^{29}\text{Si}$  MAS NMR spectra for cubic benzene-PMO (CBS\_S) (a) and thiophene-PMO (CTS\_S) (b) prepared in this study.
